# Supplementary material for: Autophagy Is Required to Sustain Increased Intestinal Cell Proliferation during Phenotypic Plasticity Changes in Honey Bee (Apis mellifera)
Source: MDPI journal article supplement (doi:10.3390/ijms24031926), 2023-01-18
Supplement: s1 [file s1]

Supplementary materials

Autophagy is Required to Sustain Increased Intestinal Cell Proliferation During Phenotypic Plasticity Changes in Honeybee (*Apis mellifera*)

Yueqin Guo <sup>1,†</sup>, Ruoyang Hu <sup>1,†</sup>, Naikang Li <sup>1</sup>, Nannan Li <sup>1</sup>, Jiangli Wu <sup>1</sup>, Huimin Yu <sup>1</sup>, Jing Tan <sup>1</sup>, Zhouhua Li <sup>2,\*</sup> and Shufa Xu <sup>1,\*</sup>

Table S1. List of genes which were differentially expressed between nurse workers (NWs) and egg laying workers (ELWs) midguts.

| genes          | logFC       | logCPM      | PValue      | FDR         | Sig. | NW   | NW   | NW   | EL   | EL   | EL   | NW_r1_TPM   | NW_r2_TPM   | NW_r3_TPM   | ELW_r1_TP   | ELW_r2  | ELW_r3  | NW_r1_   | NW_r2_FPK   | NW_r3_FPK   | ELW_r1_FPK  | ELW_r2_FPK  | ELW_r3_FPK  |
|----------------|-------------|-------------|-------------|-------------|------|------|------|------|------|------|------|-------------|-------------|-------------|-------------|---------|---------|----------|-------------|-------------|-------------|-------------|-------------|
|                |             |             |             |             |      | _r1_ | _r2_ | _r3_ | W_r  | W_r  | W_r  |             |             |             | M           | _TPM    | _TPM    | FPKM     | M           | M           | M           | M           | M           |
|                |             |             |             |             |      | Cou  | Cou  | Cou  | 1_C  | 2_C  | 3_C  |             |             |             |             |         |         |          |             |             |             |             |             |
|                |             |             |             |             |      | nt   | nt   | nt   | oun  | oun  | oun  |             |             |             |             |         |         |          |             |             |             |             |             |
|                |             |             |             |             |      |      |      |      | t    | t    | t    |             |             |             |             |         |         |          |             |             |             |             |             |
| gene-Pla2      | 11.01645017 | 5.824182696 | 3.01E-13    | 1.31E-09    | Up   | 2    | 0    | 0    | 4486 | 226  | 73   | 0.359109097 | 0           | 0           | 557.8143555 | 120.863 | 25.7013 | 0.265457 | 0           | 0           | 447.116555  | 62.43278455 | 16.12710134 |
| gene-LOC724436 | 6.843283817 | 2.833339058 | 5.75E-09    | 7.15E-06    | Up   | 2    | 1    | 2    | 501  | 38   | 8    | 0.30774399  | 0.137188788 | 0.173244459 | 53.38648364 | 17.4153 | 2.41372 | 0.227487 | 0.102635523 | 0.142041057 | 42.79197983 | 8.996032916 | 1.514560461 |
| gene-LOC411012 | 2.661589031 | 5.660916248 | 8.71E-05    | 0.00680518  | Up   | 173  | 210  | 244  | 498  | 626  | 307  | 12.11911864 | 13.11605602 | 9.622424989 | 24.15951897 | 130.613 | 42.1697 | 8.958589 | 9.812560432 | 7.88931098  | 19.36508228 | 67.46944255 | 26.46064054 |
| gene-LOC408577 | 3.010935826 | 9.393168453 | 0.00014442  | 0.008346066 | Up   | 2736 | 2473 | 1618 | 3767 | 8195 | 5649 | 29.15158019 | 23.49249584 | 9.704972282 | 27.7955732  | 260.066 | 118.019 | 21.54917 | 17.57552231 | 7.956990518 | 22.27956454 | 134.3392195 | 74.05504097 |
| gene-LOC550818 | 3.13710296  | 9.258308675 | 0.000250025 | 0.011180276 | Up   | 2425 | 1927 | 1377 | 2386 | 7463 | 5648 | 54.83535523 | 38.8498787  | 17.52881803 | 37.36400005 | 502.634 | 250.426 | 40.53491 | 29.06489436 | 14.37166793 | 29.94914494 | 259.6391716 | 157.1377933 |
| gene-LOC552216 | 1.616640315 | 3.14998835  | 0.000261916 | 0.011337979 | Up   | 63   | 54   | 78   | 195  | 56   | 71   | 2.356795974 | 1.801085095 | 1.642652939 | 5.05184545  | 6.23963 | 5.20807 | 1.742170 | 1.347452033 | 1.346791467 | 4.049310872 | 3.223126271 | 3.267960741 |
| gene-          | 2.415388799 | 4.826780115 | 0.00033     | 0.0129      | Up   | 139  | 149  | 124  | 201  | 326  | 220  | 1.960788901 | 1.873964426 | 0.984708074 | 1.963568713 | 13.6969 | 6.08521 | 1.449437 | 1.401975499 | 0.807350354 | 1.573900115 | 7.075245188 | 3.818350262 |

|           |              |             |         |        |     |      |      |      |      |      |      |             |             |             |             |         |         |          |             |             |             |             |             |  |
|-----------|--------------|-------------|---------|--------|-----|------|------|------|------|------|------|-------------|-------------|-------------|-------------|---------|---------|----------|-------------|-------------|-------------|-------------|-------------|--|
| LOC408271 |              |             | 7153    | 2319   |     |      |      |      |      |      |      |             |             |             |             | 3466    | 666     | 315      |             |             |             |             |             |  |
| gene-     | 2.492639973  | 9.050664876 | 0.00036 | 0.0135 | Up  | 2988 | 2830 | 1577 | 3759 | 4783 | 6134 | 104.7477174 | 88.45236399 | 31.12185265 | 91.25786555 | 499.406 | 421.643 | 77.43069 | 66.17417355 | 25.51643417 | 73.14781712 | 257.971786  | 264.5725542 |  |
| LOC550930 |              |             | 7134    | 53018  |     |      |      |      |      |      |      |             |             |             |             | 3955    | 1716    | 65       |             |             |             |             |             |  |
| gene-     | 2.447796789  | 7.626348352 | 0.00051 | 0.0161 | Up  | 1030 | 794  | 941  | 1233 | 1864 | 2189 | 35.3465954  | 24.29348948 | 18.17899045 | 29.30268705 | 190.522 | 147.296 | 26.12860 | 18.17477246 | 14.9047365  | 23.48759289 | 98.41564133 | 92.42578958 |  |
| LOC409286 |              |             | 3002    | 72577  |     |      |      |      |      |      |      |             |             |             |             | 388     | 847     | 279      |             |             |             |             |             |  |
| gene-     | 2.374225088  | 8.941574128 | 0.00176 | 0.0304 | Up  | 3004 | 2519 | 1771 | 2646 | 5453 | 4182 | 64.38567291 | 48.13672198 | 21.36867756 | 39.27472536 | 348.108 | 175.756 | 47.59461 | 36.01269261 | 17.51992276 | 31.48068839 | 179.8177931 | 110.28346   |  |
| LOC410795 |              |             | 9805    | 32949  |     |      |      |      |      |      |      |             |             |             |             | 4396    | 2041    | 707      |             |             |             |             |             |  |
| gene-     | 2.158522707  | 7.427061155 | 0.00188 | 0.0318 | Up  | 1303 | 1188 | 445  | 1353 | 1618 | 1667 | 37.50538584 | 30.48770242 | 7.21072623  | 26.97000487 | 138.713 | 94.0853 | 27.72440 | 22.80887045 | 5.911988058 | 21.61782956 | 71.65320058 | 59.03667172 |  |
| LOC409791 |              |             | 9457    | 60779  |     |      |      |      |      |      |      |             |             |             |             | 1018    | 8077    | 508      |             |             |             |             |             |  |
| gene-     | 2.339836464  | 6.762071425 | 0.00208 | 0.0340 | Up  | 586  | 552  | 497  | 544  | 1301 | 779  | 13.91742507 | 11.68851632 | 6.644884529 | 8.94734496  | 92.0297 | 36.2773 | 10.28791 | 8.744570214 | 5.448061226 | 7.171751705 | 47.53860431 | 22.76332909 |  |
| LOC411630 |              |             | 3646    | 14635  |     |      |      |      |      |      |      |             |             |             |             | 657     | 9205    | 79       |             |             |             |             |             |  |
| gene-     | 2.351870247  | 9.053197198 | 0.00217 | 0.0350 | Up  | 3518 | 2637 | 1822 | 2685 | 5570 | 5041 | 84.23120363 | 56.29195548 | 24.55813137 | 44.52003201 | 397.211 | 236.663 | 62.26465 | 42.1138957  | 20.13491773 | 35.68506824 | 205.1824549 | 148.5015247 |  |
| LOC726289 |              |             | 7344    | 83463  |     |      |      |      |      |      |      |             |             |             |             | 7719    | 4515    | 766      |             |             |             |             |             |  |
| gene-     | -1.608471437 | 4.542650604 | 0.00235 | 0.0364 | Dow | 338  | 401  | 799  | 199  | 24   | 85   | 32.95116025 | 34.8543845  | 43.8500976  | 13.43510589 | 6.96875 | 16.2483 | 24.35787 | 26.07573144 | 35.95216974 | 10.76892017 | 3.599756359 | 10.19553408 |  |
| LOC411376 |              |             | 6253    | 7289   | n   |      |      |      |      |      |      |             |             |             |             | 1799    | 8728    | 005      |             |             |             |             |             |  |
| gene-     | -2.141788895 | 3.392501398 | 0.00303 | 0.0418 | Dow | 124  | 158  | 447  | 120  | 8    | 9    | 5.480679673 | 6.226282989 | 11.12218288 | 3.673059698 | 1.05315 | 0.77999 | 4.051380 | 4.658090666 | 9.11894451  | 2.944144019 | 0.544014627 | 0.489431918 |  |
| LOC413263 |              |             | 4211    | 39409  | n   |      |      |      |      |      |      |             |             |             |             | 5417    | 6348    | 354      |             |             |             |             |             |  |
| gene-     | -2.35047099  | 7.679669314 | 0.00172 | 0.0299 | Dow | 2849 | 3569 | 8644 | 2247 | 85   | 253  | 195.1597874 | 217.9733853 | 333.3361533 | 106.5945415 | 17.3422 | 33.9825 | 144.2643 | 163.073184  | 273.2983191 | 85.44094232 | 8.958280723 | 21.32335081 |  |
| LOC726315 |              |             | 1744    | 01983  | n   |      |      |      |      |      |      |             |             |             |             | 945     | 3191    | 204      |             |             |             |             |             |  |

Note: The genes were ranked by the log2 Fold-change (LFC). Genes were identified by their BeeBase gene identifier. SEM is the standard error of the mean of the log2 Fold-change. FDR is the False Discovery Rate.

**Table S2.** KEGG analysis of autophagy-related pathways in midguts of ELWs.

| ID      | Description                                          |
|---------|------------------------------------------------------|
| ko04020 | Calcium signaling pathway                            |
| ko04611 | Platelet activation                                  |
| ko04933 | AGE-RAGE signaling pathway in diabetic complications |
| ko04925 | Aldosterone synthesis and secretion                  |
| ko04916 | Melanogenesis                                        |
| ko04972 | Pancreatic secretion                                 |
| ko04912 | GnRH signaling pathway                               |
| ko04071 | Sphingolipid signaling pathway                       |
| ko04024 | cAMP signaling pathway                               |
| ko04919 | Thyroid hormone signaling pathway                    |
| ko04010 | MAPK signaling pathway                               |
| ko04911 | Insulin secretion                                    |

**Table S3.** Primer sequences for qRT-PCR analysis.

| Number | Gene                                              | Gene ID | Forward primer           | Reverse primer            | Product length (bp) |
|--------|---------------------------------------------------|---------|--------------------------|---------------------------|---------------------|
| 1      | <i>pla2</i>                                       | 406141  | TGCTCTCGCGTACTCTGTGA     | TCCTATCCCTGATTTGCCAT      | 206                 |
| 2      | <i>phospholipase A2-like</i>                      | 724436  | CCTGTTCCCTCCACGTTTCTG    | ATAAGCTTGCGTTCCACAGA      | 245                 |
| 3      | <i>rapgap1</i>                                    | 408271  | CAAGACACGGTCAAACAGGC     | GAAGTGGCTGGCGATCATAT      | 206                 |
| 4      | <i>transcription factor ap-1</i>                  | 726289  | TTTTCTCCCGGAGTGTCG       | AATCCCGATTTTCCCGAA        | 198                 |
| 5      | <i>sphingomyelin phosphodiesterase 1</i>          | 726315  | AGAACCAGTTTGTTGCCGA      | CTTGATGTGTATCCTTCATGTGA   | 146                 |
| 6      | <i>putative inorganic phosphate cotransporter</i> | 413263  | GGTGAATGGGTACCAGCGA      | CATGAACGATAACACCGACG      | 241                 |
| 7      | <i>estrogen sulfotransferase</i>                  | 411376  | AATGACTCTTGAACCACCGA     | GACCTACAAGCACCCAACCT      | 104                 |
| 8      | <i>atg1</i>                                       | 552571  | TTCAGAACGTGCCTCACAGA     | AGTGCTGCTGATTGACACATT     | 122                 |
| 9      | <i>atg2</i>                                       | 726497  | TACGGTACCAAGTTCTGGCG     | AGTTACTAATGTATTGCCGTCTTTT | 145                 |
| 10     | <i>atg3</i>                                       | 552315  | GGCTTCAGTTCATCCATGCAG    | ACTCCAAGTTCACGACCACC      | 84                  |
| 11     | <i>atg4b</i>                                      | 552197  | TCCTTCTGTAGCACTTTGTTTCT  | GCAACATCTTCAACCGACCA      | 153                 |
| 12     | <i>atg5</i>                                       | 551057  | CCACTCTGCACAGATAAGATACGA | TCTGGAAACCTATCAAAGTGGACA  | 197                 |
| 13     | <i>atg6</i>                                       | 408834  | GCTGAACTTTCACCTCCCATC    | TGTTTCCCCAGAGTCACCAAC     | 150                 |
| 14     | <i>atg8</i>                                       | 411870  | AGGGCAGCACAAACCAATGT     | GCAACCCTTTGTGCAAATGAA     | 216                 |
| 15     | <i>atg10</i>                                      | 726781  | CCAATGCTTTGCCAGACAAGT    | TCCATTATTCTCAGATCACTCCTGT | 113                 |

|    |              |           |                           |                           |     |
|----|--------------|-----------|---------------------------|---------------------------|-----|
| 16 | <i>atg12</i> | 113219359 | TGTTATACACCTACTCAGGAGAATC | TGTACGTTAAGTTTCAAATGCCCCG | 95  |
| 17 | <i>atg13</i> | 551384    | CCTCCTCCAGTCTCAACAGC      | CGGCGAAAGGAGTTTCAAAT      | 211 |
| 18 | <i>rp49</i>  | 406099    | CGTCATATGTTGCCAACTGGT     | TTGAGCACGTTCAACAATGG      | 150 |

**Table S4.** D-4, -5, and -6 diet without or with RJ for honeybee larvae.

|            | Day | RJ (g) | glucose (g) | fructose (g) | yeast extract (g) | ddH <sub>2</sub> O (mL) |
|------------|-----|--------|-------------|--------------|-------------------|-------------------------|
| Without RJ | D-4 | 0      | 8           | 4            | 0.5               | 47.5                    |
|            | D-5 | 0      | 8           | 4            | 0.5               | 47.5                    |
|            | D-6 | 0      | 8           | 4            | 0.5               | 47.5                    |
| With RJ    | D-4 | 40     | 8           | 4            | 0.5               | 47.5                    |
|            | D-5 | 40     | 8           | 4            | 0.5               | 47.5                    |
|            | D-6 | 40     | 8           | 4            | 0.5               | 47.5                    |

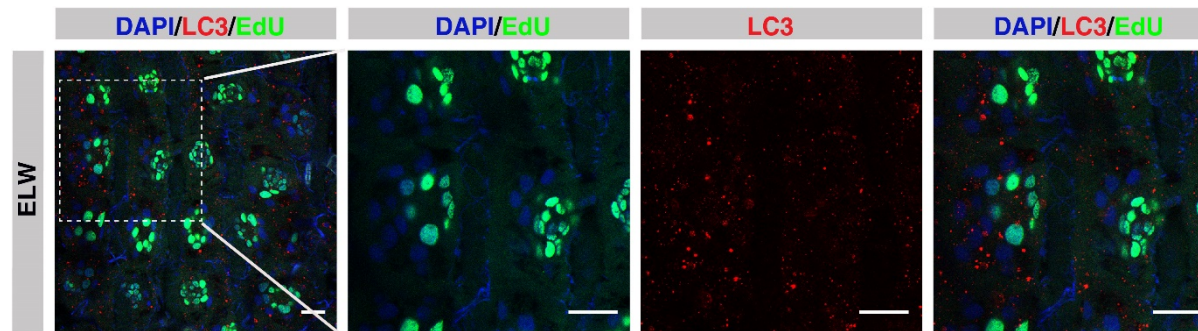

**Figure S1.** The colocalization of EdU and LC3 in midguts of ELWs. In all the panels except graphs, blue indicates DAPI staining, green indicates EdU positive cells, and red indicates LC3 staining. In replicating chromosomes, EdU is integrated into newly synthesized DNA. The signal of LC3 is almost dispersed in cytoplasm of ELWs midguts. Scale bars, 25  $\mu$ m.

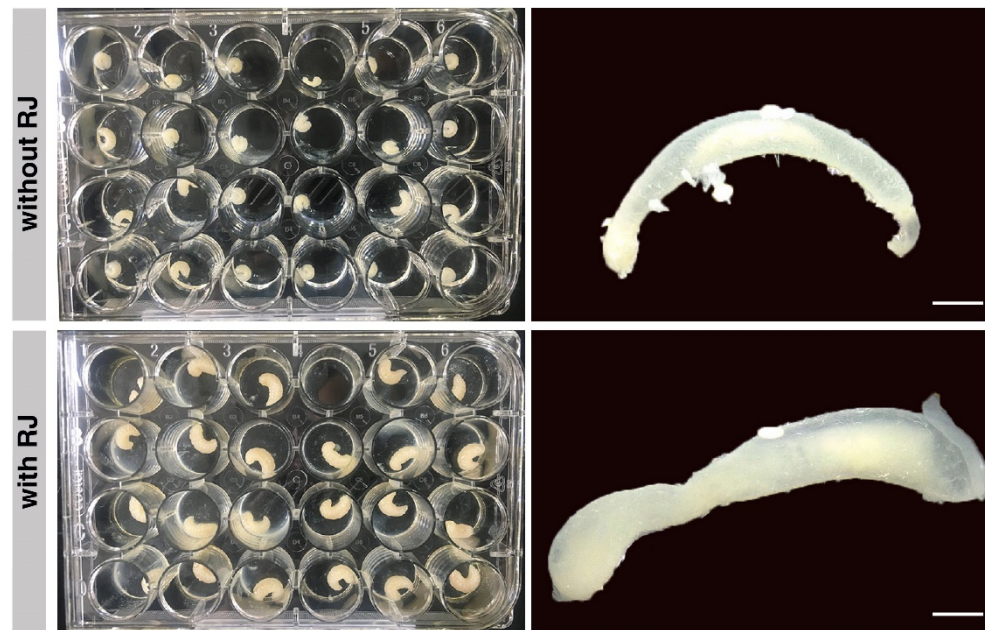

**Figure S2.** RJ affects the larvae body and midgut sizes. The body and midgut sizes of larvae reared with RJ were much larger than those without RJ. Scale bars, 1 mm.

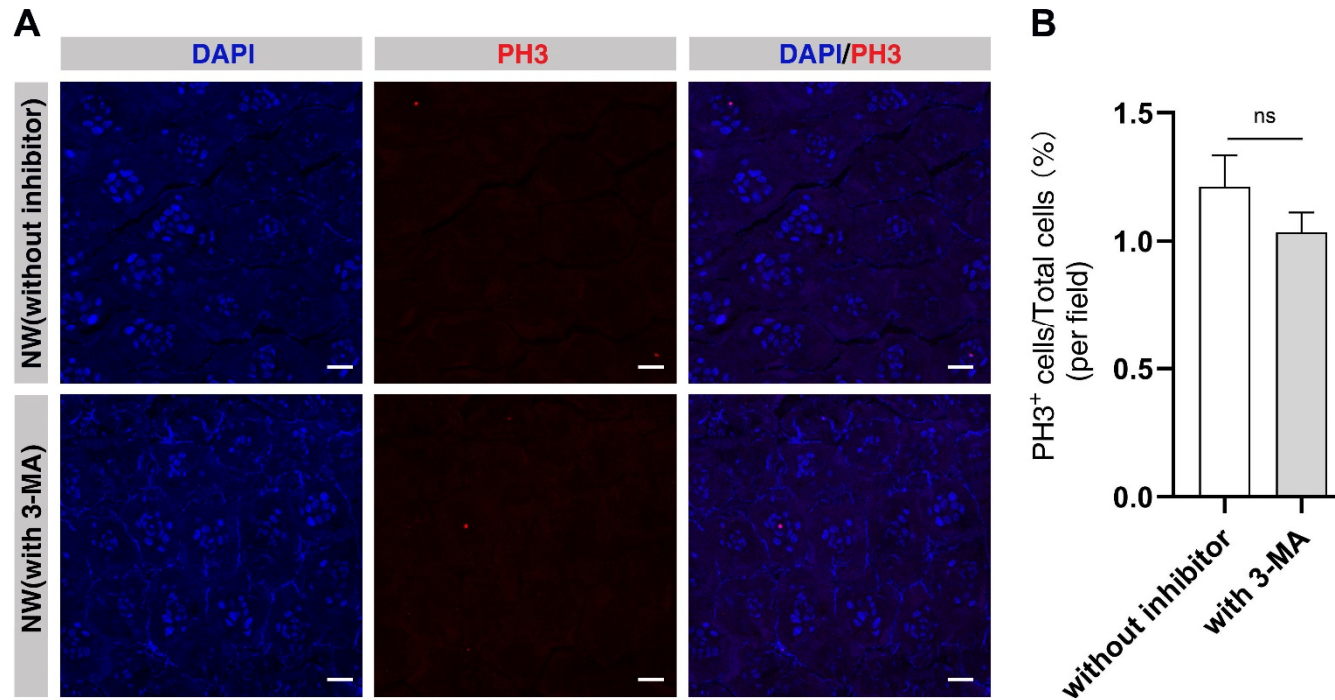

**Figure S3.** No obvious difference in intestinal cell proliferation of NWs treated with or without 3-MA. (A) Detection of cell proliferation with PH3 antibody in the midguts of NWs which were fed with or without 3-MA. In all the panels except graphs, blue indicates DAPI staining, and red indicates PH3 staining. Scale bars, 25  $\mu$ m. (B) The percentage of PH3 positive cells in the midguts of NWs fed with or without 3-MA (with 3-MA,  $1.03 \pm 0.09\%$ ,  $n = 10$  intestines; without inhibitor,  $1.21 \pm 0.13\%$ ,  $n = 10$  intestines). Means  $\pm$  SEM are shown. Significant differences between the midguts of NWs fed with or without 3-MA were determined by one way ANOVA/Dunn's Method. There is no significant differences between the midguts of NWs treated with or without 3-MA. ns = not significant.
